# Supplementary material for: Lead Extraction and Mortality Among Patients With Cardiac Implanted Electronic Device Infection
Source: PubMed Central journal article supplement — JAMA Cardiol. 2023 Oct 18;8(12):1165–73. doi: 10.1001/jamacardio.2023.3379 (PMC10585491; doi:10.1001/jamacardio.2023.3379), 2023-10-18
Supplement: jamacardiol-e233379-s001.pdf [file jamacardiol-e233379-s001.pdf]

## Supplementary Online Content

Pokorney SD, Zepel L, Greiner MA, et al. Lead extraction and mortality among patients with cardiac implanted electronic device infection. *JAMA Cardiol*. Published online October 18, 2023. doi:10.1001/jamacardio.2023.3379

**eFigure.** Graphical Demonstration of the Study Design

**eTable 1.** Codes Used to Determine De Novo Pacemaker or ICD Implantation Procedure

**eTable 2.** Codes Used to Determine CIED Infection

**eTable 3.** Antibiotic Therapy

**eTable 4.** Extraction Codes

**eTable 5.** Baseline Characteristics of Infection Cohort, Excluding ESKD and Patients Aged Younger Than 65 Years

**eTable 6.** Association Between Extraction and All-Cause Mortality, Excluding ESKD and Patients Aged Younger Than 65 Years

**eTable 7.** Association Between Extraction and All-Cause Mortality, Including Adjustment for Frailty Indicator

This supplementary material has been provided by the authors to give readers additional information about their work.

eFigure.

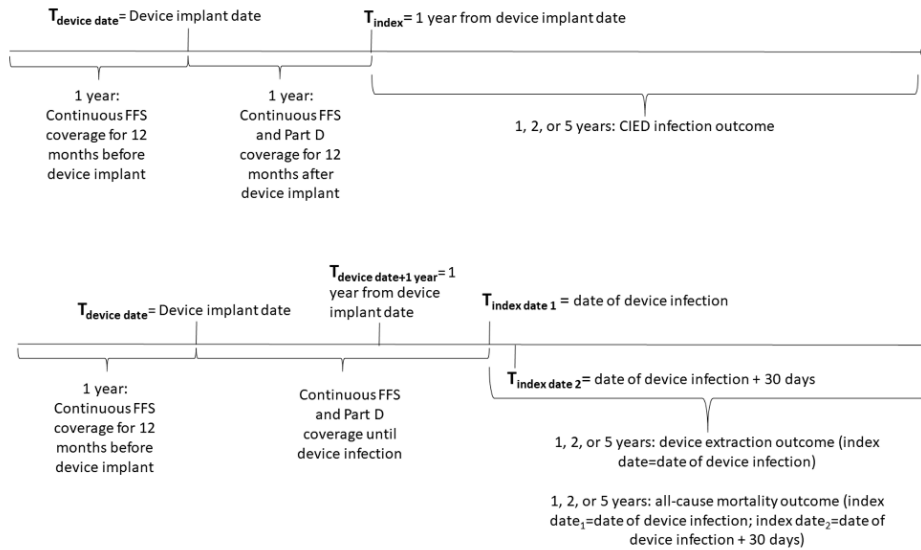

Figure Legend: Graphical demonstration of the study design.  $T_{\text{device date}}$  was the date of de novo pacemaker or implantable cardioverter defibrillator implantation. Inclusion criteria required that patients had 1 year of Medicare fee-for-service coverage prior to device implantation. Panel A demonstrated the rates of cardiac implantable electronic device (CIED) infection. The  $T_{\text{index}}$  was 1 year after device implant, and the 1-, 2-, and 5-year CIED infection rates were determined from  $T_{\text{index}}$ . Panel B demonstrated the rates of CIED extraction and the mortality rates for CIED infection patients. The  $T_{\text{index date 1}}$  was the date of device infection, and the extraction rates were determined at 1-, 2-, and 5-years after the date of device infection. The  $T_{\text{index date 2}}$  was 30 days after the device infection, and all-cause mortality was determined at 1-, 2-, and 5-years after the  $T_{\text{index date 2}}$ .

**eTable 1. Codes used to determine de novo pacemaker or ICD implantation procedure**

| <b>Pacemaker de novo implant</b>              | <b>ICD de novo implant</b> |
|-----------------------------------------------|----------------------------|
| CPT code                                      | CPT code                   |
| 33206                                         | 33249+33225 [CRT-D]        |
| 33207                                         | 33249                      |
| 33208                                         |                            |
| 33206+33225, 33207+33225, 33208+33225 [CRT-P] |                            |

**eTable 2. Codes used to determine CIED infection**

| ICD-9-CM list* |                                                                                   | ICD-10-CM List* |                                                                                                                       |
|----------------|-----------------------------------------------------------------------------------|-----------------|-----------------------------------------------------------------------------------------------------------------------|
| Code           | Description                                                                       | Code            | Description                                                                                                           |
| 996.61         | Infection and inflammatory reaction due to cardiac device, implant                | T82.6XXA        | Infection and inflammatory reaction due to cardiac valve prosthesis, initial encounter                                |
| 996.60         | Infection and inflammatory reaction due to unspecified device, implant, and graft | T82.7XXA        | Infection and inflammatory reaction due to other cardiac and vascular devices, implants and grafts, initial encounter |
| 996.62         | Infection and inflammatory reaction due to vascular device, implant               | T85.79XA        | Infection and inflammatory reaction due to other internal prosthetic devices, implants and grafts, initial encounter  |
| 421.0          | Acute and subacute endocarditis                                                   | I33.0           | Acute and subacute infective endocarditis                                                                             |
| 421.1          | Acute and subacute infective endocarditis in diseases classified elsewhere        | I33.9           | Acute and subacute endocarditis, unspecified                                                                          |
| 421.9          | Acute endocarditis unspecified                                                    | I39             | Endocarditis and heart valve disorders in diseases classified elsewhere                                               |
| 424.90         | Endocarditis                                                                      | I38             | Endocarditis, valve unspecified                                                                                       |
| 424.91         | Endocarditis in diseases classified elsewhere                                     |                 |                                                                                                                       |

\* in the primary position from the carrier, inpatient, or outpatient file

**eTable 3. Antibiotic therapy**

| Class                         | Generic Med name                       | HCPCS code                      |
|-------------------------------|----------------------------------------|---------------------------------|
| Antibiotics                   | Vancomycin                             | J3370                           |
|                               | Daptomycin                             | J0878                           |
|                               | Linezolid                              | J2020                           |
|                               | Cefazolin                              | J0690                           |
|                               | Nafcillin                              | S0032 [Not payable by Medicare] |
|                               | Piperacillin-tazobactam                | J2543                           |
|                               | Cefepime                               | J0692                           |
|                               | Meropenem                              | J2185                           |
|                               | Imipenem                               | J0743                           |
|                               | Ertapenem                              | J1335                           |
|                               | Aztreonam                              | S0073 [Not payable by medicare] |
|                               | Ciprofloxacin                          | J0744                           |
|                               | Micafungin                             | J2248                           |
|                               | Fluconazole                            | J1450                           |
|                               | Voriconazole                           | J3465                           |
|                               | Ceftriaxone                            | J0696                           |
|                               | Gentamicin                             | J1580                           |
|                               | Amikacin                               | J0278                           |
|                               | Tobramycin                             | J3260                           |
|                               | Ampicillin Sodium/Ampicillin Sulbactam | J0290, J0295                    |
|                               | Clindamycin                            | S0077 [Not payable by Medicare] |
| Metronidazole                 | S0030 [Not payable by Medicare]        |                                 |
| Trimethoprim/Sulfamethoxazole | S0039 [Not payable by Medicare]        |                                 |

**eTable 4. Extraction codes**

| Code      |                                                                                                             |
|-----------|-------------------------------------------------------------------------------------------------------------|
| CPT 33234 | Removal of transvenous pacemaker electrode(s); single lead system, atrial or ventricular                    |
| CPT 33235 | Removal of transvenous pacemaker electrode(s); dual lead system                                             |
| CPT 33244 | Removal of single or dual chamber pacing cardioverter-defibrillator electrode(s); by transvenous extraction |

**eTable 5: Baseline characteristics of infection cohort, excluding ESKD and patients < 65 years**

|                                       |                   |
|---------------------------------------|-------------------|
| N                                     | 6,176             |
| Age at infection, years               | 78.0 (74.0, 84.0) |
| Age group at infection, %             |                   |
| <65                                   | 0 (0.0)           |
| 65-<75                                | 1,854 (30.0)      |
| 75-<85                                | 2,908 (47.1)      |
| 85+                                   | 1,414 (22.9)      |
| Female, %                             | 2,223 (36.0)      |
| Race, %                               |                   |
| White                                 | 5,584 (90.4)      |
| Black                                 | 334 (5.4)         |
| Other                                 | 258 (4.2)         |
| Comorbidities, %                      |                   |
| Dementia                              | 768 (12.4)        |
| Diabetes mellitus                     | 3,535 (57.2)      |
| Ischemic heart disease                | 5,487 (88.8)      |
| Peripheral vascular disease           | 3,716 (60.2)      |
| Congestive heart failure              | 5,061 (81.9)      |
| Cerebrovascular disease               | 3,106 (50.3)      |
| Hypertension                          | 6,049 (97.9)      |
| Chronic obstructive pulmonary disease | 4,104 (66.5)      |
| Renal disease                         | 3,357 (54.4)      |
| Stroke/Transient ischemic attack      | 1,974 (32.0)      |
| Myocardial infarction                 | 2,517 (40.8)      |
| Cancer                                | 1,801 (29.2)      |
| Valvular heart disease                | 5,119 (82.9)      |
| Device type, %                        |                   |
| CRT-D                                 | 852 (13.8)        |
| CRT-P                                 | 156 (2.5)         |

|                                   |                |
|-----------------------------------|----------------|
| Pacemaker                         | 3,755 (60.8)   |
| ICD                               | 1,413 (22.9)   |
| Region, %                         |                |
| Midwest                           | 1,490 (24.1)   |
| Northeast                         | 1,152 (18.7)   |
| South                             | 2,545 (41.2)   |
| West and Other                    | 989 (16.0)     |
| Dual Medicaid eligibility, %      | 1,250 (20.2)   |
| Time since device implant, years  | 4.1 (2.6)      |
| Claims-based frailty indicator, % | 2,690 (43.6)   |
| Frailty index                     | 0.2 (0.1, 0.4) |



**eTable 6. Association between extraction and all-cause mortality, excluding ESKD and patients < 65 years**

| Parameter                                      | HR (95% CI)       | p-value |
|------------------------------------------------|-------------------|---------|
| Extraction within 30 days                      |                   |         |
| Extraction 0-6 days, time-dependent (Ref=No)   | 0.68 (0.58, 0.79) | < .001  |
| Extraction, 7-30 days, time-dependent (Ref=No) | 0.93 (0.74, 1.16) | .51     |
| Age at infection, per 5 years                  | 1.11 (1.07, 1.16) | < .001  |
| Female                                         | 1.09 (0.97, 1.23) | .13     |
| Race (Ref=White)                               |                   |         |
| Black                                          | 1.01 (0.82, 1.24) | .93     |
| Other                                          | 0.66 (0.50, 0.87) | .004    |
| Medicaid dual eligibility                      | 1.24 (1.08, 1.41) | .002    |
| Region (Ref=South)                             |                   |         |
| Midwest                                        | 0.95 (0.83, 1.09) | .46     |
| Northeast                                      | 0.97 (0.84, 1.11) | .66     |
| West                                           | 0.82 (0.69, 0.96) | .02     |
| Comorbidities                                  |                   |         |
| Myocardial infarction                          | 1.15 (1.03, 1.29) | .01     |
| Peripheral vascular disease                    | 1.25 (1.12, 1.40) | < .001  |
| Cerebrovascular disease                        | 0.82 (0.70, 0.96) | .01     |
| Dementia                                       | 1.82 (1.58, 2.08) | < .001  |
| Chronic obstructive pulmonary disease          | 1.40 (1.23, 1.59) | < .001  |
| Renal disease                                  | 1.55 (1.37, 1.74) | < .001  |
| Congestive heart failure                       | 1.43 (1.19, 1.73) | < .001  |
| Stroke/TIA                                     | 1.42 (1.21, 1.66) | < .001  |
| Ischemic heart disease                         | 1.05 (0.85, 1.29) | .66     |
| Diabetes mellitus                              | 1.07 (0.96, 1.20) | .20     |
| Hypertension                                   | 0.72 (0.47, 1.11) | .14     |
| Valvular heart disease                         | 1.16 (1.00, 1.36) | .06     |
| Cancer                                         | 1.19 (1.07, 1.33) | .002    |
| Device type (Ref=Pacemaker)                    |                   |         |

| Parameter                       | HR (95% CI)       | p-value |
|---------------------------------|-------------------|---------|
| CRT-D                           | 1.28 (1.10, 1.49) | .001    |
| CRT-P                           | 1.08 (0.78, 1.49) | .64     |
| ICD                             | 1.29 (1.13, 1.48) | < .001  |
| Time from device implant, years | 1.02 (0.99, 1.04) | .14     |
| Year of infection, per 1 year   | 1.00 (0.98, 1.02) | .98     |

The time-dependent indicators of extraction <7 days and extraction 7-30 days were included in the model. Cox model adjusted for age, sex, race, Medicaid dual eligibility, baseline comorbidities, device type, geographic region, year of device infection, and years since device implant.

**eTable 7. Association between extraction and all-cause mortality, including adjustment for frailty indicator.**

| Parameter                                      | HR (95% CI)       | p-value |
|------------------------------------------------|-------------------|---------|
| Extraction within 30 days                      |                   |         |
| Extraction 0-6 days, time-dependent (Ref=No)   | 0.69 (0.61, 0.78) | < .001  |
| Extraction, 7-30 days, time-dependent (Ref=No) | 0.88 (0.74, 1.05) | .15     |
| Age at infection, per 5 years                  | 1.05 (1.03, 1.07) | < .001  |
| Female                                         | 1.07 (1.00, 1.15) | .05     |
| Race (Ref=White)                               |                   |         |
| Black                                          | 0.92 (0.83, 1.01) | .08     |
| Other                                          | 0.86 (0.75, 0.99) | .03     |
| Medicaid dual eligibility                      | 1.14 (1.05, 1.23) | .002    |
| Region (Ref=South)                             |                   |         |
| Midwest                                        | 0.95 (0.87, 1.04) | .26     |
| Northeast                                      | 0.91 (0.83, 1.00) | .04     |
| Other                                          | 1.07 (0.42, 2.76) | .89     |
| West                                           | 0.85 (0.75, 0.95) | .003    |
| Comorbidities                                  |                   |         |
| Myocardial infarction                          | 1.12 (1.04, 1.21) | .002    |
| Peripheral vascular disease                    | 1.26 (1.17, 1.37) | < .001  |
| Cerebrovascular disease                        | 0.96 (0.87, 1.06) | .41     |
| Dementia                                       | 1.43 (1.30, 1.58) | < .001  |
| Chronic obstructive pulmonary disease          | 1.23 (1.13, 1.34) | < .001  |
| Renal disease                                  | 1.90 (1.71, 2.10) | < .001  |
| Congestive heart failure                       | 1.43 (1.24, 1.65) | < .001  |
| Stroke/TIA                                     | 1.23 (1.11, 1.36) | < .001  |
| Ischemic heart disease                         | 1.09 (0.92, 1.28) | .32     |
| Diabetes mellitus                              | 1.13 (1.04, 1.23) | .003    |
| Hypertension                                   | 0.92 (0.62, 1.35) | .66     |

| Parameter                       | HR (95% CI)       | p-value |
|---------------------------------|-------------------|---------|
| Valvular heart disease          | 1.13 (1.03, 1.24) | .008    |
| Cancer                          | 1.13 (1.05, 1.22) | .001    |
| Device type (Ref=Pacemaker)     |                   |         |
| CRT-D                           | 1.07 (0.96, 1.19) | .23     |
| CRT-P                           | 0.97 (0.76, 1.23) | .78     |
| ICD                             | 1.15 (1.05, 1.25) | .002    |
| Time from device implant, years | 1.00 (0.99, 1.02) | .87     |
| Year of infection, per 1 year   | 0.99 (0.98, 1.00) | .09     |
| Frailty indicator               | 1.29 (1.18, 1.41) | < .001  |

The time-dependent indicators of extraction <7 days and extraction 7-30 days were included in the model. Cox model adjusted for age, sex, race, Medicaid dual eligibility, baseline comorbidities, device type, geographic region, frailty, year of device infection, and years since device implant.
