# Supplementary material for: Lead Extraction and Mortality Among Patients With Cardiac Implanted Electronic Device Infection
Source: PubMed Central journal article supplement — JAMA Cardiol. 2023 Oct 18;8(12):1165–73. doi: 10.1001/jamacardio.2023.3379 (PMC10585491; doi:10.1001/jamacardio.2023.3379), 2023-10-18
Supplement: jamacardiol-e233379-s002.pdf [file jamacardiol-e233379-s002.pdf]

## Data Sharing Statement

Pokorney. Lead Extraction and Mortality Among Patients With Cardiac Implanted Electronic Device Infection. *JAMA Cardiol.* Published October 18, 2023.

doi:10.1001/jamacardio.2023.3379

### Data

**Data available:** No

### Additional Information

**Explanation for why data not available:** CMS data rules do not allow sharing. The data cannot be exported from the VDRC as per CMS rules.
